# Supplementary material for: Conveying facial expressions to blind and visually impaired persons through a wearable vibrotactile device
Source: PLoS One. 2018 Mar 27;13(3):e0194737. doi: 10.1371/journal.pone.0194737 (PMC5870993; doi:10.1371/journal.pone.0194737)
Supplement: S1 Dataset — The data that was used for analysis. (XLSX) [file pone.0194737.s001.xlsx]

## Sheet: 20170512 Data
ID	Age	Group	Phase	Stimulus	Emotion	Choice	FaceReader
1	21	SP	Control	Pictures	Surprise	1
1	21	SP	Control	Pictures	Joy	1
1	21	SP	Control	Pictures	Disgust	1
1	21	SP	Control	Pictures	Disgust	1
1	21	SP	Control	Pictures	Fear	0
1	21	SP	Control	Pictures	Surprise	1
1	21	SP	Control	Pictures	Fear	0
1	21	SP	Control	Pictures	Anger	1
1	21	SP	Control	Pictures	Sadness	1
1	21	SP	Control	Pictures	Sadness	1
1	21	SP	Control	Pictures	Anger	1
1	21	SP	Control	Pictures	Joy	1
1	21	SP	Control	Silent videos	Joy	1
1	21	SP	Control	Silent videos	Sadness	1
1	21	SP	Control	Silent videos	Joy	1
1	21	SP	Control	Silent videos	Fear	0
1	21	SP	Control	Silent videos	Disgust	0
1	21	SP	Control	Silent videos	Disgust	0
1	21	SP	Control	Silent videos	Surprise	1
1	21	SP	Control	Silent videos	Fear	1
1	21	SP	Control	Silent videos	Anger	1
1	21	SP	Control	Silent videos	Anger	1
1	21	SP	Control	Silent videos	Sadness	1
1	21	SP	Control	Silent videos	Surprise	1
1	21	SP	Control	Videos with audio	Joy	1
1	21	SP	Control	Videos with audio	Joy	1
1	21	SP	Control	Videos with audio	Anger	1
1	21	SP	Control	Videos with audio	Surprise	1
1	21	SP	Control	Videos with audio	Surprise	1
1	21	SP	Control	Videos with audio	Fear	0
1	21	SP	Control	Videos with audio	Anger	1
1	21	SP	Control	Videos with audio	Disgust	1
1	21	SP	Control	Videos with audio	Sadness	1
1	21	SP	Control	Videos with audio	Sadness	1
1	21	SP	Control	Videos with audio	Fear	1
1	21	SP	Control	Videos with audio	Disgust	1
1	21	SP	Supported	Pictures	Joy	1	1
1	21	SP	Supported	Pictures	Fear	0	0
1	21	SP	Supported	Pictures	Sadness	1	1
1	21	SP	Supported	Pictures	Fear	1	1
1	21	SP	Supported	Pictures	Disgust	1	1
1	21	SP	Supported	Pictures	Anger	1	0
1	21	SP	Supported	Pictures	Surprise	1	1
1	21	SP	Supported	Pictures	Joy	1	1
1	21	SP	Supported	Pictures	Disgust	1	1
1	21	SP	Supported	Pictures	Sadness	1	1
1	21	SP	Supported	Pictures	Surprise	1	1
1	21	SP	Supported	Pictures	Anger	1	0
1	21	SP	Supported	Silent videos	Surprise	1	1
1	21	SP	Supported	Silent videos	Disgust	1	1
1	21	SP	Supported	Silent videos	Sadness	1	1
1	21	SP	Supported	Silent videos	Disgust	1	1
1	21	SP	Supported	Silent videos	Anger	1	0
1	21	SP	Supported	Silent videos	Sadness	1	1
1	21	SP	Supported	Silent videos	Joy	1	1
1	21	SP	Supported	Silent videos	Joy	1	1
1	21	SP	Supported	Silent videos	Fear	0	0
1	21	SP	Supported	Silent videos	Fear	0	1
1	21	SP	Supported	Silent videos	Surprise	1	1
1	21	SP	Supported	Silent videos	Anger	1	0
1	21	SP	Supported	Videos with audio	Sadness	1	0
1	21	SP	Supported	Videos with audio	Surprise	1	1
1	21	SP	Supported	Videos with audio	Disgust	1	0
1	21	SP	Supported	Videos with audio	Joy	1	1
1	21	SP	Supported	Videos with audio	Fear	0	1
1	21	SP	Supported	Videos with audio	Sadness	1	1
1	21	SP	Supported	Videos with audio	Anger	1	0
1	21	SP	Supported	Videos with audio	Surprise	1	1
1	21	SP	Supported	Videos with audio	Disgust	1	0
1	21	SP	Supported	Videos with audio	Fear	1	1
1	21	SP	Supported	Videos with audio	Joy	1	1
1	21	SP	Supported	Videos with audio	Anger	1	0
2	27	VIP	Control	Pictures	Surprise	0
2	27	VIP	Control	Pictures	Joy	0
2	27	VIP	Control	Pictures	Disgust	0
2	27	VIP	Control	Pictures	Disgust	0
2	27	VIP	Control	Pictures	Fear	0
2	27	VIP	Control	Pictures	Surprise	0
2	27	VIP	Control	Pictures	Fear	0
2	27	VIP	Control	Pictures	Anger	0
2	27	VIP	Control	Pictures	Sadness	0
2	27	VIP	Control	Pictures	Sadness	0
2	27	VIP	Control	Pictures	Anger	0
2	27	VIP	Control	Pictures	Joy	0
2	27	VIP	Control	Silent videos	Joy	0
2	27	VIP	Control	Silent videos	Sadness	0
2	27	VIP	Control	Silent videos	Joy	0
2	27	VIP	Control	Silent videos	Fear	0
2	27	VIP	Control	Silent videos	Disgust	0
2	27	VIP	Control	Silent videos	Disgust	0
2	27	VIP	Control	Silent videos	Surprise	0
2	27	VIP	Control	Silent videos	Fear	0
2	27	VIP	Control	Silent videos	Anger	0
2	27	VIP	Control	Silent videos	Anger	0
2	27	VIP	Control	Silent videos	Sadness	0
2	27	VIP	Control	Silent videos	Surprise	0
2	27	VIP	Control	Videos with audio	Joy	1
2	27	VIP	Control	Videos with audio	Joy	1
2	27	VIP	Control	Videos with audio	Anger	0
2	27	VIP	Control	Videos with audio	Surprise	1
2	27	VIP	Control	Videos with audio	Surprise	1
2	27	VIP	Control	Videos with audio	Fear	1
2	27	VIP	Control	Videos with audio	Anger	0
2	27	VIP	Control	Videos with audio	Disgust	1
2	27	VIP	Control	Videos with audio	Sadness	1
2	27	VIP	Control	Videos with audio	Sadness	1
2	27	VIP	Control	Videos with audio	Fear	1
2	27	VIP	Control	Videos with audio	Disgust	0
2	27	VIP	Supported	Pictures	Joy	1	1
2	27	VIP	Supported	Pictures	Fear	0	0
2	27	VIP	Supported	Pictures	Sadness	1	1
2	27	VIP	Supported	Pictures	Fear	1	1
2	27	VIP	Supported	Pictures	Disgust	1	1
2	27	VIP	Supported	Pictures	Anger	0	0
2	27	VIP	Supported	Pictures	Surprise	1	1
2	27	VIP	Supported	Pictures	Joy	1	1
2	27	VIP	Supported	Pictures	Disgust	1	1
2	27	VIP	Supported	Pictures	Sadness	1	1
2	27	VIP	Supported	Pictures	Surprise	1	0
2	27	VIP	Supported	Pictures	Anger	0	0
2	27	VIP	Supported	Silent videos	Surprise	1	1
2	27	VIP	Supported	Silent videos	Disgust	1	1
2	27	VIP	Supported	Silent videos	Sadness	0	0
2	27	VIP	Supported	Silent videos	Disgust	1	1
2	27	VIP	Supported	Silent videos	Anger	0	1
2	27	VIP	Supported	Silent videos	Sadness	1	1
2	27	VIP	Supported	Silent videos	Joy	0	1
2	27	VIP	Supported	Silent videos	Joy	0	1
2	27	VIP	Supported	Silent videos	Fear	0	1
2	27	VIP	Supported	Silent videos	Fear	1	1
2	27	VIP	Supported	Silent videos	Surprise	1	1
2	27	VIP	Supported	Silent videos	Anger	0	1
2	27	VIP	Supported	Videos with audio	Sadness	1	0
2	27	VIP	Supported	Videos with audio	Surprise	1	1
2	27	VIP	Supported	Videos with audio	Disgust	1	0
2	27	VIP	Supported	Videos with audio	Joy	0	1
2	27	VIP	Supported	Videos with audio	Fear	1	1
2	27	VIP	Supported	Videos with audio	Sadness	1	1
2	27	VIP	Supported	Videos with audio	Anger	1	0
2	27	VIP	Supported	Videos with audio	Surprise	1	1
2	27	VIP	Supported	Videos with audio	Disgust	1	1
2	27	VIP	Supported	Videos with audio	Fear	1	1
2	27	VIP	Supported	Videos with audio	Joy	1	1
2	27	VIP	Supported	Videos with audio	Anger	1	0
3	18	VIP	Control	Pictures	Surprise	0
3	18	VIP	Control	Pictures	Joy	0
3	18	VIP	Control	Pictures	Disgust	0
3	18	VIP	Control	Pictures	Disgust	0
3	18	VIP	Control	Pictures	Fear	0
3	18	VIP	Control	Pictures	Surprise	0
3	18	VIP	Control	Pictures	Fear	0
3	18	VIP	Control	Pictures	Anger	0
3	18	VIP	Control	Pictures	Sadness	0
3	18	VIP	Control	Pictures	Sadness	0
3	18	VIP	Control	Pictures	Anger	0
3	18	VIP	Control	Pictures	Joy	0
3	18	VIP	Control	Silent videos	Joy	0
3	18	VIP	Control	Silent videos	Sadness	0
3	18	VIP	Control	Silent videos	Joy	0
3	18	VIP	Control	Silent videos	Fear	0
3	18	VIP	Control	Silent videos	Disgust	0
3	18	VIP	Control	Silent videos	Disgust	0
3	18	VIP	Control	Silent videos	Surprise	0
3	18	VIP	Control	Silent videos	Fear	0
3	18	VIP	Control	Silent videos	Anger	0
3	18	VIP	Control	Silent videos	Anger	0
3	18	VIP	Control	Silent videos	Sadness	0
3	18	VIP	Control	Silent videos	Surprise	0
3	18	VIP	Control	Videos with audio	Joy	1
3	18	VIP	Control	Videos with audio	Joy	0
3	18	VIP	Control	Videos with audio	Anger	0
3	18	VIP	Control	Videos with audio	Surprise	1
3	18	VIP	Control	Videos with audio	Surprise	1
3	18	VIP	Control	Videos with audio	Fear	1
3	18	VIP	Control	Videos with audio	Anger	1
3	18	VIP	Control	Videos with audio	Disgust	1
3	18	VIP	Control	Videos with audio	Sadness	1
3	18	VIP	Control	Videos with audio	Sadness	1
3	18	VIP	Control	Videos with audio	Fear	1
3	18	VIP	Control	Videos with audio	Disgust	0
3	18	VIP	Supported	Pictures	Joy	1	1
3	18	VIP	Supported	Pictures	Fear	1	1
3	18	VIP	Supported	Pictures	Sadness	1	1
3	18	VIP	Supported	Pictures	Fear	1	1
3	18	VIP	Supported	Pictures	Disgust	1	1
3	18	VIP	Supported	Pictures	Anger	0	0
3	18	VIP	Supported	Pictures	Surprise	1	1
3	18	VIP	Supported	Pictures	Joy	1	1
3	18	VIP	Supported	Pictures	Disgust	0	0
3	18	VIP	Supported	Pictures	Sadness	1	1
3	18	VIP	Supported	Pictures	Surprise	0	0
3	18	VIP	Supported	Pictures	Anger	1	0
3	18	VIP	Supported	Silent videos	Surprise	1	1
3	18	VIP	Supported	Silent videos	Disgust	0	0
3	18	VIP	Supported	Silent videos	Sadness	1	1
3	18	VIP	Supported	Silent videos	Disgust	1	0
3	18	VIP	Supported	Silent videos	Anger	0	0
3	18	VIP	Supported	Silent videos	Sadness	0	0
3	18	VIP	Supported	Silent videos	Joy	1	1
3	18	VIP	Supported	Silent videos	Joy	1	1
3	18	VIP	Supported	Silent videos	Fear	0	0
3	18	VIP	Supported	Silent videos	Fear	0	0
3	18	VIP	Supported	Silent videos	Surprise	0	0
3	18	VIP	Supported	Silent videos	Anger	0	0
3	18	VIP	Supported	Videos with audio	Sadness	1	0
3	18	VIP	Supported	Videos with audio	Surprise	0	0
3	18	VIP	Supported	Videos with audio	Disgust	1	0
3	18	VIP	Supported	Videos with audio	Joy	1	1
3	18	VIP	Supported	Videos with audio	Fear	0	0
3	18	VIP	Supported	Videos with audio	Sadness	1	1
3	18	VIP	Supported	Videos with audio	Anger	1	0
3	18	VIP	Supported	Videos with audio	Surprise	1	1
3	18	VIP	Supported	Videos with audio	Disgust	1	0
3	18	VIP	Supported	Videos with audio	Fear	1	1
3	18	VIP	Supported	Videos with audio	Joy	1	1
3	18	VIP	Supported	Videos with audio	Anger	1	0
4	58	VIP	Control	Pictures	Surprise	0
4	58	VIP	Control	Pictures	Joy	0
4	58	VIP	Control	Pictures	Disgust	0
4	58	VIP	Control	Pictures	Disgust	0
4	58	VIP	Control	Pictures	Fear	0
4	58	VIP	Control	Pictures	Surprise	0
4	58	VIP	Control	Pictures	Fear	0
4	58	VIP	Control	Pictures	Anger	0
4	58	VIP	Control	Pictures	Sadness	0
4	58	VIP	Control	Pictures	Sadness	0
4	58	VIP	Control	Pictures	Anger	0
4	58	VIP	Control	Pictures	Joy	0
4	58	VIP	Control	Silent videos	Joy	0
4	58	VIP	Control	Silent videos	Sadness	0
4	58	VIP	Control	Silent videos	Joy	0
4	58	VIP	Control	Silent videos	Fear	0
4	58	VIP	Control	Silent videos	Disgust	0
4	58	VIP	Control	Silent videos	Disgust	0
4	58	VIP	Control	Silent videos	Surprise	0
4	58	VIP	Control	Silent videos	Fear	0
4	58	VIP	Control	Silent videos	Anger	0
4	58	VIP	Control	Silent videos	Anger	0
4	58	VIP	Control	Silent videos	Sadness	0
4	58	VIP	Control	Silent videos	Surprise	0
4	58	VIP	Control	Videos with audio	Joy	1
4	58	VIP	Control	Videos with audio	Joy	0
4	58	VIP	Control	Videos with audio	Anger	0
4	58	VIP	Control	Videos with audio	Surprise	1
4	58	VIP	Control	Videos with audio	Surprise	1
4	58	VIP	Control	Videos with audio	Fear	0
4	58	VIP	Control	Videos with audio	Anger	1
4	58	VIP	Control	Videos with audio	Disgust	0
4	58	VIP	Control	Videos with audio	Sadness	0
4	58	VIP	Control	Videos with audio	Sadness	1
4	58	VIP	Control	Videos with audio	Fear	0
4	58	VIP	Control	Videos with audio	Disgust	0
4	58	VIP	Supported	Pictures	Joy	1	1
4	58	VIP	Supported	Pictures	Fear	0	0
4	58	VIP	Supported	Pictures	Sadness	1	1
4	58	VIP	Supported	Pictures	Fear	1	1
4	58	VIP	Supported	Pictures	Disgust	0	1
4	58	VIP	Supported	Pictures	Anger	0	0
4	58	VIP	Supported	Pictures	Surprise	0	1
4	58	VIP	Supported	Pictures	Joy	1	1
4	58	VIP	Supported	Pictures	Disgust	1	1
4	58	VIP	Supported	Pictures	Sadness	1	1
4	58	VIP	Supported	Pictures	Surprise	0	1
4	58	VIP	Supported	Pictures	Anger	1	0
4	58	VIP	Supported	Silent videos	Surprise	1	1
4	58	VIP	Supported	Silent videos	Disgust	0	1
4	58	VIP	Supported	Silent videos	Sadness	1	1
4	58	VIP	Supported	Silent videos	Disgust	0	1
4	58	VIP	Supported	Silent videos	Anger	1	1
4	58	VIP	Supported	Silent videos	Sadness	1	1
4	58	VIP	Supported	Silent videos	Joy	1	1
4	58	VIP	Supported	Silent videos	Joy	1	1
4	58	VIP	Supported	Silent videos	Fear	1	0
4	58	VIP	Supported	Silent videos	Fear	1	1
4	58	VIP	Supported	Silent videos	Surprise	1	1
4	58	VIP	Supported	Silent videos	Anger	0	0
4	58	VIP	Supported	Videos with audio	Sadness	1	0
4	58	VIP	Supported	Videos with audio	Surprise	1	1
4	58	VIP	Supported	Videos with audio	Disgust	1	0
4	58	VIP	Supported	Videos with audio	Joy	1	1
4	58	VIP	Supported	Videos with audio	Fear	1	0
4	58	VIP	Supported	Videos with audio	Sadness	1	0
4	58	VIP	Supported	Videos with audio	Anger	1	0
4	58	VIP	Supported	Videos with audio	Surprise	1	1
4	58	VIP	Supported	Videos with audio	Disgust	1	0
4	58	VIP	Supported	Videos with audio	Fear	0	0
4	58	VIP	Supported	Videos with audio	Joy	1	1
4	58	VIP	Supported	Videos with audio	Anger	1	0
5	23	VIP	Control	Pictures	Surprise	0
5	23	VIP	Control	Pictures	Joy	1
5	23	VIP	Control	Pictures	Disgust	0
5	23	VIP	Control	Pictures	Disgust	1
5	23	VIP	Control	Pictures	Fear	1
5	23	VIP	Control	Pictures	Surprise	0
5	23	VIP	Control	Pictures	Fear	0
5	23	VIP	Control	Pictures	Anger	1
5	23	VIP	Control	Pictures	Sadness	1
5	23	VIP	Control	Pictures	Sadness	1
5	23	VIP	Control	Pictures	Anger	0
5	23	VIP	Control	Pictures	Joy	1
5	23	VIP	Control	Silent videos	Joy	1
5	23	VIP	Control	Silent videos	Sadness	1
5	23	VIP	Control	Silent videos	Joy	1
5	23	VIP	Control	Silent videos	Fear	0
5	23	VIP	Control	Silent videos	Disgust	1
5	23	VIP	Control	Silent videos	Disgust	1
5	23	VIP	Control	Silent videos	Surprise	1
5	23	VIP	Control	Silent videos	Fear	0
5	23	VIP	Control	Silent videos	Anger	1
5	23	VIP	Control	Silent videos	Anger	1
5	23	VIP	Control	Silent videos	Sadness	1
5	23	VIP	Control	Silent videos	Surprise	1
5	23	VIP	Control	Videos with audio	Joy	1
5	23	VIP	Control	Videos with audio	Joy	1
5	23	VIP	Control	Videos with audio	Anger	1
5	23	VIP	Control	Videos with audio	Surprise	1
5	23	VIP	Control	Videos with audio	Surprise	1
5	23	VIP	Control	Videos with audio	Fear	0
5	23	VIP	Control	Videos with audio	Anger	1
5	23	VIP	Control	Videos with audio	Disgust	1
5	23	VIP	Control	Videos with audio	Sadness	1
5	23	VIP	Control	Videos with audio	Sadness	1
5	23	VIP	Control	Videos with audio	Fear	1
5	23	VIP	Control	Videos with audio	Disgust	1
5	23	VIP	Supported	Pictures	Joy	1	1
5	23	VIP	Supported	Pictures	Fear	1	1
5	23	VIP	Supported	Pictures	Sadness	1	1
5	23	VIP	Supported	Pictures	Fear	1	1
5	23	VIP	Supported	Pictures	Disgust	1	1
5	23	VIP	Supported	Pictures	Anger	0	0
5	23	VIP	Supported	Pictures	Surprise	0	1
5	23	VIP	Supported	Pictures	Joy	1	1
5	23	VIP	Supported	Pictures	Disgust	0	1
5	23	VIP	Supported	Pictures	Sadness	1	1
5	23	VIP	Supported	Pictures	Surprise	1	1
5	23	VIP	Supported	Pictures	Anger	1	0
5	23	VIP	Supported	Silent videos	Surprise	1	1
5	23	VIP	Supported	Silent videos	Disgust	1	1
5	23	VIP	Supported	Silent videos	Sadness	0	0
5	23	VIP	Supported	Silent videos	Disgust	1	1
5	23	VIP	Supported	Silent videos	Anger	1	0
5	23	VIP	Supported	Silent videos	Sadness	0	1
5	23	VIP	Supported	Silent videos	Joy	1	1
5	23	VIP	Supported	Silent videos	Joy	1	1
5	23	VIP	Supported	Silent videos	Fear	0	1
5	23	VIP	Supported	Silent videos	Fear	1	1
5	23	VIP	Supported	Silent videos	Surprise	1	0
5	23	VIP	Supported	Silent videos	Anger	1	0
5	23	VIP	Supported	Videos with audio	Sadness	1	0
5	23	VIP	Supported	Videos with audio	Surprise	1	1
5	23	VIP	Supported	Videos with audio	Disgust	1	1
5	23	VIP	Supported	Videos with audio	Joy	1	1
5	23	VIP	Supported	Videos with audio	Fear	0	1
5	23	VIP	Supported	Videos with audio	Sadness	1	1
5	23	VIP	Supported	Videos with audio	Anger	1	0
5	23	VIP	Supported	Videos with audio	Surprise	1	1
5	23	VIP	Supported	Videos with audio	Disgust	1	1
5	23	VIP	Supported	Videos with audio	Fear	1	1
5	23	VIP	Supported	Videos with audio	Joy	1	1
5	23	VIP	Supported	Videos with audio	Anger	1	0
13	62	SP	Control	Pictures	Surprise	0
13	62	SP	Control	Pictures	Joy	1
13	62	SP	Control	Pictures	Disgust	1
13	62	SP	Control	Pictures	Disgust	1
13	62	SP	Control	Pictures	Fear	1
13	62	SP	Control	Pictures	Surprise	1
13	62	SP	Control	Pictures	Fear	1
13	62	SP	Control	Pictures	Anger	1
13	62	SP	Control	Pictures	Sadness	1
13	62	SP	Control	Pictures	Sadness	0
13	62	SP	Control	Pictures	Anger	0
13	62	SP	Control	Pictures	Joy	1
13	62	SP	Control	Silent videos	Joy	1
13	62	SP	Control	Silent videos	Sadness	0
13	62	SP	Control	Silent videos	Joy	1
13	62	SP	Control	Silent videos	Fear	1
13	62	SP	Control	Silent videos	Disgust	1
13	62	SP	Control	Silent videos	Disgust	1
13	62	SP	Control	Silent videos	Surprise	1
13	62	SP	Control	Silent videos	Fear	1
13	62	SP	Control	Silent videos	Anger	1
13	62	SP	Control	Silent videos	Anger	1
13	62	SP	Control	Silent videos	Sadness	0
13	62	SP	Control	Silent videos	Surprise	1
13	62	SP	Control	Videos with audio	Joy	1
13	62	SP	Control	Videos with audio	Joy	1
13	62	SP	Control	Videos with audio	Anger	0
13	62	SP	Control	Videos with audio	Surprise	1
13	62	SP	Control	Videos with audio	Surprise	1
13	62	SP	Control	Videos with audio	Fear	0
13	62	SP	Control	Videos with audio	Anger	1
13	62	SP	Control	Videos with audio	Disgust	1
13	62	SP	Control	Videos with audio	Sadness	1
13	62	SP	Control	Videos with audio	Sadness	1
13	62	SP	Control	Videos with audio	Fear	1
13	62	SP	Control	Videos with audio	Disgust	1
13	62	SP	Supported	Pictures	Joy	1	1
13	62	SP	Supported	Pictures	Fear	1	1
13	62	SP	Supported	Pictures	Sadness	0	1
13	62	SP	Supported	Pictures	Fear	1	1
13	62	SP	Supported	Pictures	Disgust	1	1
13	62	SP	Supported	Pictures	Anger	1	0
13	62	SP	Supported	Pictures	Surprise	1	1
13	62	SP	Supported	Pictures	Joy	1	1
13	62	SP	Supported	Pictures	Disgust	1	0
13	62	SP	Supported	Pictures	Sadness	1	1
13	62	SP	Supported	Pictures	Surprise	1	1
13	62	SP	Supported	Pictures	Anger	1	0
13	62	SP	Supported	Silent videos	Surprise	1	1
13	62	SP	Supported	Silent videos	Disgust	1	1
13	62	SP	Supported	Silent videos	Sadness	1	1
13	62	SP	Supported	Silent videos	Disgust	1	1
13	62	SP	Supported	Silent videos	Anger	1	0
13	62	SP	Supported	Silent videos	Sadness	1	1
13	62	SP	Supported	Silent videos	Joy	1	1
13	62	SP	Supported	Silent videos	Joy	1	1
13	62	SP	Supported	Silent videos	Fear	1	1
13	62	SP	Supported	Silent videos	Fear	1	0
13	62	SP	Supported	Silent videos	Surprise	1	1
13	62	SP	Supported	Silent videos	Anger	1	0
13	62	SP	Supported	Videos with audio	Sadness	1	0
13	62	SP	Supported	Videos with audio	Surprise	1	1
13	62	SP	Supported	Videos with audio	Disgust	1	1
13	62	SP	Supported	Videos with audio	Joy	1	1
13	62	SP	Supported	Videos with audio	Fear	1	0
13	62	SP	Supported	Videos with audio	Sadness	1	1
13	62	SP	Supported	Videos with audio	Anger	1	0
13	62	SP	Supported	Videos with audio	Surprise	1	1
13	62	SP	Supported	Videos with audio	Disgust	1	1
13	62	SP	Supported	Videos with audio	Fear	1	1
13	62	SP	Supported	Videos with audio	Joy	1	1
13	62	SP	Supported	Videos with audio	Anger	1	0
9	58	SP	Control	Pictures	Surprise	1
9	58	SP	Control	Pictures	Joy	1
9	58	SP	Control	Pictures	Disgust	0
9	58	SP	Control	Pictures	Disgust	0
9	58	SP	Control	Pictures	Fear	1
9	58	SP	Control	Pictures	Surprise	0
9	58	SP	Control	Pictures	Fear	1
9	58	SP	Control	Pictures	Anger	1
9	58	SP	Control	Pictures	Sadness	0
9	58	SP	Control	Pictures	Sadness	0
9	58	SP	Control	Pictures	Anger	1
9	58	SP	Control	Pictures	Joy	1
9	58	SP	Control	Silent videos	Joy	1
9	58	SP	Control	Silent videos	Sadness	0
9	58	SP	Control	Silent videos	Joy	1
9	58	SP	Control	Silent videos	Fear	1
9	58	SP	Control	Silent videos	Disgust	0
9	58	SP	Control	Silent videos	Disgust	0
9	58	SP	Control	Silent videos	Surprise	1
9	58	SP	Control	Silent videos	Fear	1
9	58	SP	Control	Silent videos	Anger	1
9	58	SP	Control	Silent videos	Anger	1
9	58	SP	Control	Silent videos	Sadness	0
9	58	SP	Control	Silent videos	Surprise	1
9	58	SP	Control	Videos with audio	Joy	1
9	58	SP	Control	Videos with audio	Joy	1
9	58	SP	Control	Videos with audio	Anger	1
9	58	SP	Control	Videos with audio	Surprise	1
9	58	SP	Control	Videos with audio	Surprise	1
9	58	SP	Control	Videos with audio	Fear	0
9	58	SP	Control	Videos with audio	Anger	1
9	58	SP	Control	Videos with audio	Disgust	0
9	58	SP	Control	Videos with audio	Sadness	0
9	58	SP	Control	Videos with audio	Sadness	1
9	58	SP	Control	Videos with audio	Fear	1
9	58	SP	Control	Videos with audio	Disgust	1
9	58	SP	Supported	Pictures	Joy	1	1
9	58	SP	Supported	Pictures	Fear	1	0
9	58	SP	Supported	Pictures	Sadness	0	1
9	58	SP	Supported	Pictures	Fear	1	1
9	58	SP	Supported	Pictures	Disgust	1	1
9	58	SP	Supported	Pictures	Anger	0	0
9	58	SP	Supported	Pictures	Surprise	1	1
9	58	SP	Supported	Pictures	Joy	1	1
9	58	SP	Supported	Pictures	Disgust	1	1
9	58	SP	Supported	Pictures	Sadness	1	1
9	58	SP	Supported	Pictures	Surprise	1	1
9	58	SP	Supported	Pictures	Anger	1	0
9	58	SP	Supported	Silent videos	Surprise	1	1
9	58	SP	Supported	Silent videos	Disgust	1	1
9	58	SP	Supported	Silent videos	Sadness	1	1
9	58	SP	Supported	Silent videos	Disgust	1	1
9	58	SP	Supported	Silent videos	Anger	0	0
9	58	SP	Supported	Silent videos	Sadness	1	1
9	58	SP	Supported	Silent videos	Joy	1	1
9	58	SP	Supported	Silent videos	Joy	1	1
9	58	SP	Supported	Silent videos	Fear	1	0
9	58	SP	Supported	Silent videos	Fear	1	1
9	58	SP	Supported	Silent videos	Surprise	1	0
9	58	SP	Supported	Silent videos	Anger	1	1
9	58	SP	Supported	Videos with audio	Sadness	1	0
9	58	SP	Supported	Videos with audio	Surprise	1	1
9	58	SP	Supported	Videos with audio	Disgust	1	1
9	58	SP	Supported	Videos with audio	Joy	1	1
9	58	SP	Supported	Videos with audio	Fear	1	1
9	58	SP	Supported	Videos with audio	Sadness	1	1
9	58	SP	Supported	Videos with audio	Anger	1	1
9	58	SP	Supported	Videos with audio	Surprise	1	1
9	58	SP	Supported	Videos with audio	Disgust	1	1
9	58	SP	Supported	Videos with audio	Fear	1	1
9	58	SP	Supported	Videos with audio	Joy	1	1
9	58	SP	Supported	Videos with audio	Anger	1	0
11	23	SP	Control	Pictures	Surprise	1
11	23	SP	Control	Pictures	Joy	1
11	23	SP	Control	Pictures	Disgust	1
11	23	SP	Control	Pictures	Disgust	1
11	23	SP	Control	Pictures	Fear	1
11	23	SP	Control	Pictures	Surprise	1
11	23	SP	Control	Pictures	Fear	0
11	23	SP	Control	Pictures	Anger	1
11	23	SP	Control	Pictures	Sadness	1
11	23	SP	Control	Pictures	Sadness	1
11	23	SP	Control	Pictures	Anger	1
11	23	SP	Control	Pictures	Joy	1
11	23	SP	Control	Silent videos	Joy	1
11	23	SP	Control	Silent videos	Sadness	0
11	23	SP	Control	Silent videos	Joy	1
11	23	SP	Control	Silent videos	Fear	1
11	23	SP	Control	Silent videos	Disgust	1
11	23	SP	Control	Silent videos	Disgust	1
11	23	SP	Control	Silent videos	Surprise	1
11	23	SP	Control	Silent videos	Fear	1
11	23	SP	Control	Silent videos	Anger	1
11	23	SP	Control	Silent videos	Anger	1
11	23	SP	Control	Silent videos	Sadness	1
11	23	SP	Control	Silent videos	Surprise	1
11	23	SP	Control	Videos with audio	Joy	1
11	23	SP	Control	Videos with audio	Joy	1
11	23	SP	Control	Videos with audio	Anger	1
11	23	SP	Control	Videos with audio	Surprise	1
11	23	SP	Control	Videos with audio	Surprise	1
11	23	SP	Control	Videos with audio	Fear	1
11	23	SP	Control	Videos with audio	Anger	1
11	23	SP	Control	Videos with audio	Disgust	1
11	23	SP	Control	Videos with audio	Sadness	1
11	23	SP	Control	Videos with audio	Sadness	1
11	23	SP	Control	Videos with audio	Fear	1
11	23	SP	Control	Videos with audio	Disgust	1
11	23	SP	Supported	Pictures	Joy	1	1
11	23	SP	Supported	Pictures	Fear	1	0
11	23	SP	Supported	Pictures	Sadness	0	1
11	23	SP	Supported	Pictures	Fear	0	1
11	23	SP	Supported	Pictures	Disgust	1	0
11	23	SP	Supported	Pictures	Anger	1	0
11	23	SP	Supported	Pictures	Surprise	1	1
11	23	SP	Supported	Pictures	Joy	1	1
11	23	SP	Supported	Pictures	Disgust	1	1
11	23	SP	Supported	Pictures	Sadness	1	1
11	23	SP	Supported	Pictures	Surprise	1	0
11	23	SP	Supported	Pictures	Anger	1	0
11	23	SP	Supported	Silent videos	Surprise	1	1
11	23	SP	Supported	Silent videos	Disgust	1	1
11	23	SP	Supported	Silent videos	Sadness	1	1
11	23	SP	Supported	Silent videos	Disgust	1	1
11	23	SP	Supported	Silent videos	Anger	1	1
11	23	SP	Supported	Silent videos	Sadness	1	1
11	23	SP	Supported	Silent videos	Joy	1	1
11	23	SP	Supported	Silent videos	Joy	1	1
11	23	SP	Supported	Silent videos	Fear	1	1
11	23	SP	Supported	Silent videos	Fear	1	1
11	23	SP	Supported	Silent videos	Surprise	1	1
11	23	SP	Supported	Silent videos	Anger	1	1
11	23	SP	Supported	Videos with audio	Sadness	1	0
11	23	SP	Supported	Videos with audio	Surprise	1	1
11	23	SP	Supported	Videos with audio	Disgust	1	1
11	23	SP	Supported	Videos with audio	Joy	1	1
11	23	SP	Supported	Videos with audio	Fear	1	1
11	23	SP	Supported	Videos with audio	Sadness	1	1
11	23	SP	Supported	Videos with audio	Anger	1	1
11	23	SP	Supported	Videos with audio	Surprise	1	1
11	23	SP	Supported	Videos with audio	Disgust	1	1
11	23	SP	Supported	Videos with audio	Fear	1	1
11	23	SP	Supported	Videos with audio	Joy	1	1
11	23	SP	Supported	Videos with audio	Anger	1	1
6	44	VIP	Control	Pictures	Surprise	1
6	44	VIP	Control	Pictures	Joy	1
6	44	VIP	Control	Pictures	Disgust	1
6	44	VIP	Control	Pictures	Disgust	0
6	44	VIP	Control	Pictures	Fear	1
6	44	VIP	Control	Pictures	Surprise	0
6	44	VIP	Control	Pictures	Fear	0
6	44	VIP	Control	Pictures	Anger	1
6	44	VIP	Control	Pictures	Sadness	1
6	44	VIP	Control	Pictures	Sadness	1
6	44	VIP	Control	Pictures	Anger	1
6	44	VIP	Control	Pictures	Joy	1
6	44	VIP	Control	Silent videos	Joy	1
6	44	VIP	Control	Silent videos	Sadness	1
6	44	VIP	Control	Silent videos	Joy	1
6	44	VIP	Control	Silent videos	Fear	1
6	44	VIP	Control	Silent videos	Disgust	1
6	44	VIP	Control	Silent videos	Disgust	1
6	44	VIP	Control	Silent videos	Surprise	1
6	44	VIP	Control	Silent videos	Fear	1
6	44	VIP	Control	Silent videos	Anger	1
6	44	VIP	Control	Silent videos	Anger	1
6	44	VIP	Control	Silent videos	Sadness	1
6	44	VIP	Control	Silent videos	Surprise	1
6	44	VIP	Control	Videos with audio	Joy	1
6	44	VIP	Control	Videos with audio	Joy	1
6	44	VIP	Control	Videos with audio	Anger	1
6	44	VIP	Control	Videos with audio	Surprise	1
6	44	VIP	Control	Videos with audio	Surprise	1
6	44	VIP	Control	Videos with audio	Fear	1
6	44	VIP	Control	Videos with audio	Anger	1
6	44	VIP	Control	Videos with audio	Disgust	1
6	44	VIP	Control	Videos with audio	Sadness	1
6	44	VIP	Control	Videos with audio	Sadness	1
6	44	VIP	Control	Videos with audio	Fear	1
6	44	VIP	Control	Videos with audio	Disgust	1
6	44	VIP	Supported	Pictures	Joy	1	1
6	44	VIP	Supported	Pictures	Fear	0	0
6	44	VIP	Supported	Pictures	Sadness	1	1
6	44	VIP	Supported	Pictures	Fear	0	1
6	44	VIP	Supported	Pictures	Disgust	1	1
6	44	VIP	Supported	Pictures	Anger	1	0
6	44	VIP	Supported	Pictures	Surprise	1	1
6	44	VIP	Supported	Pictures	Joy	1	1
6	44	VIP	Supported	Pictures	Disgust	1	1
6	44	VIP	Supported	Pictures	Sadness	1	1
6	44	VIP	Supported	Pictures	Surprise	1	1
6	44	VIP	Supported	Pictures	Anger	1	1
6	44	VIP	Supported	Silent videos	Surprise	1	1
6	44	VIP	Supported	Silent videos	Disgust	1	1
6	44	VIP	Supported	Silent videos	Sadness	1	1
6	44	VIP	Supported	Silent videos	Disgust	1	1
6	44	VIP	Supported	Silent videos	Anger	1	1
6	44	VIP	Supported	Silent videos	Sadness	1	0
6	44	VIP	Supported	Silent videos	Joy	1	1
6	44	VIP	Supported	Silent videos	Joy	1	1
6	44	VIP	Supported	Silent videos	Fear	1	1
6	44	VIP	Supported	Silent videos	Fear	0	0
6	44	VIP	Supported	Silent videos	Surprise	1	1
6	44	VIP	Supported	Silent videos	Anger	1	0
6	44	VIP	Supported	Videos with audio	Sadness	1	1
6	44	VIP	Supported	Videos with audio	Surprise	1	1
6	44	VIP	Supported	Videos with audio	Disgust	1	1
6	44	VIP	Supported	Videos with audio	Joy	1	1
6	44	VIP	Supported	Videos with audio	Fear	1	1
6	44	VIP	Supported	Videos with audio	Sadness	1	1
6	44	VIP	Supported	Videos with audio	Anger	1	0
6	44	VIP	Supported	Videos with audio	Surprise	1	1
6	44	VIP	Supported	Videos with audio	Disgust	1	1
6	44	VIP	Supported	Videos with audio	Fear	1	0
6	44	VIP	Supported	Videos with audio	Joy	1	1
6	44	VIP	Supported	Videos with audio	Anger	1	1
10	68	SP	Control	Pictures	Surprise	1
10	68	SP	Control	Pictures	Joy	1
10	68	SP	Control	Pictures	Disgust	0
10	68	SP	Control	Pictures	Disgust	1
10	68	SP	Control	Pictures	Fear	1
10	68	SP	Control	Pictures	Surprise	1
10	68	SP	Control	Pictures	Fear	1
10	68	SP	Control	Pictures	Anger	1
10	68	SP	Control	Pictures	Sadness	1
10	68	SP	Control	Pictures	Sadness	1
10	68	SP	Control	Pictures	Anger	1
10	68	SP	Control	Pictures	Joy	1
10	68	SP	Control	Silent videos	Joy	1
10	68	SP	Control	Silent videos	Sadness	0
10	68	SP	Control	Silent videos	Joy	1
10	68	SP	Control	Silent videos	Fear	1
10	68	SP	Control	Silent videos	Disgust	1
10	68	SP	Control	Silent videos	Disgust	1
10	68	SP	Control	Silent videos	Surprise	1
10	68	SP	Control	Silent videos	Fear	1
10	68	SP	Control	Silent videos	Anger	1
10	68	SP	Control	Silent videos	Anger	1
10	68	SP	Control	Silent videos	Sadness	0
10	68	SP	Control	Silent videos	Surprise	1
10	68	SP	Control	Videos with audio	Joy	1
10	68	SP	Control	Videos with audio	Joy	1
10	68	SP	Control	Videos with audio	Anger	1
10	68	SP	Control	Videos with audio	Surprise	1
10	68	SP	Control	Videos with audio	Surprise	1
10	68	SP	Control	Videos with audio	Fear	1
10	68	SP	Control	Videos with audio	Anger	1
10	68	SP	Control	Videos with audio	Disgust	1
10	68	SP	Control	Videos with audio	Sadness	1
10	68	SP	Control	Videos with audio	Sadness	1
10	68	SP	Control	Videos with audio	Fear	1
10	68	SP	Control	Videos with audio	Disgust	1
10	68	SP	Supported	Pictures	Joy	1	1
10	68	SP	Supported	Pictures	Fear	1	0
10	68	SP	Supported	Pictures	Sadness	0	1
10	68	SP	Supported	Pictures	Fear	0	1
10	68	SP	Supported	Pictures	Disgust	1	1
10	68	SP	Supported	Pictures	Anger	1	0
10	68	SP	Supported	Pictures	Surprise	1	1
10	68	SP	Supported	Pictures	Joy	1	1
10	68	SP	Supported	Pictures	Disgust	1	1
10	68	SP	Supported	Pictures	Sadness	1	1
10	68	SP	Supported	Pictures	Surprise	1	1
10	68	SP	Supported	Pictures	Anger	1	1
10	68	SP	Supported	Silent videos	Surprise	1	1
10	68	SP	Supported	Silent videos	Disgust	1	1
10	68	SP	Supported	Silent videos	Sadness	1	0
10	68	SP	Supported	Silent videos	Disgust	1	1
10	68	SP	Supported	Silent videos	Anger	1	1
10	68	SP	Supported	Silent videos	Sadness	1	1
10	68	SP	Supported	Silent videos	Joy	1	1
10	68	SP	Supported	Silent videos	Joy	1	1
10	68	SP	Supported	Silent videos	Fear	1	0
10	68	SP	Supported	Silent videos	Fear	1	0
10	68	SP	Supported	Silent videos	Surprise	1	1
10	68	SP	Supported	Silent videos	Anger	1	0
10	68	SP	Supported	Videos with audio	Sadness	1	0
10	68	SP	Supported	Videos with audio	Surprise	1	1
10	68	SP	Supported	Videos with audio	Disgust	1	1
10	68	SP	Supported	Videos with audio	Joy	1	1
10	68	SP	Supported	Videos with audio	Fear	1	1
10	68	SP	Supported	Videos with audio	Sadness	1	1
10	68	SP	Supported	Videos with audio	Anger	1	1
10	68	SP	Supported	Videos with audio	Surprise	1	1
10	68	SP	Supported	Videos with audio	Disgust	1	1
10	68	SP	Supported	Videos with audio	Fear	1	1
10	68	SP	Supported	Videos with audio	Joy	1	1
10	68	SP	Supported	Videos with audio	Anger	1	0
12	25	SP	Supported	Pictures	Surprise	1	0
12	25	SP	Supported	Pictures	Joy	1	1
12	25	SP	Supported	Pictures	Disgust	1	1
12	25	SP	Supported	Pictures	Disgust	1	1
12	25	SP	Supported	Pictures	Fear	0	1
12	25	SP	Supported	Pictures	Surprise	1	0
12	25	SP	Supported	Pictures	Fear	1	0
12	25	SP	Supported	Pictures	Anger	1	1
12	25	SP	Supported	Pictures	Sadness	1	1
12	25	SP	Supported	Pictures	Sadness	1	1
12	25	SP	Supported	Pictures	Anger	1	1
12	25	SP	Supported	Pictures	Joy	1	1
12	25	SP	Supported	Silent videos	Joy	1	1
12	25	SP	Supported	Silent videos	Sadness	1	1
12	25	SP	Supported	Silent videos	Joy	1	1
12	25	SP	Supported	Silent videos	Fear	0	1
12	25	SP	Supported	Silent videos	Disgust	1	1
12	25	SP	Supported	Silent videos	Disgust	1	1
12	25	SP	Supported	Silent videos	Surprise	1	1
12	25	SP	Supported	Silent videos	Fear	1	1
12	25	SP	Supported	Silent videos	Anger	1	0
12	25	SP	Supported	Silent videos	Anger	1	0
12	25	SP	Supported	Silent videos	Sadness	1	1
12	25	SP	Supported	Silent videos	Surprise	1	1
12	25	SP	Supported	Videos with audio	Joy	1	1
12	25	SP	Supported	Videos with audio	Joy	1	1
12	25	SP	Supported	Videos with audio	Anger	1	0
12	25	SP	Supported	Videos with audio	Surprise	1	1
12	25	SP	Supported	Videos with audio	Surprise	1	1
12	25	SP	Supported	Videos with audio	Fear	1	1
12	25	SP	Supported	Videos with audio	Anger	1	0
12	25	SP	Supported	Videos with audio	Disgust	1	1
12	25	SP	Supported	Videos with audio	Sadness	1	1
12	25	SP	Supported	Videos with audio	Sadness	1	1
12	25	SP	Supported	Videos with audio	Fear	1	0
12	25	SP	Supported	Videos with audio	Disgust	1	0
12	25	SP	Control	Pictures	Joy	1
12	25	SP	Control	Pictures	Fear	1
12	25	SP	Control	Pictures	Sadness	1
12	25	SP	Control	Pictures	Fear	0
12	25	SP	Control	Pictures	Disgust	1
12	25	SP	Control	Pictures	Anger	0
12	25	SP	Control	Pictures	Surprise	1
12	25	SP	Control	Pictures	Joy	1
12	25	SP	Control	Pictures	Disgust	1
12	25	SP	Control	Pictures	Sadness	1
12	25	SP	Control	Pictures	Surprise	0
12	25	SP	Control	Pictures	Anger	1
12	25	SP	Control	Silent videos	Surprise	1
12	25	SP	Control	Silent videos	Disgust	1
12	25	SP	Control	Silent videos	Sadness	1
12	25	SP	Control	Silent videos	Disgust	1
12	25	SP	Control	Silent videos	Anger	1
12	25	SP	Control	Silent videos	Sadness	1
12	25	SP	Control	Silent videos	Joy	1
12	25	SP	Control	Silent videos	Joy	1
12	25	SP	Control	Silent videos	Fear	1
12	25	SP	Control	Silent videos	Fear	0
12	25	SP	Control	Silent videos	Surprise	1
12	25	SP	Control	Silent videos	Anger	1
12	25	SP	Control	Videos with audio	Sadness	1
12	25	SP	Control	Videos with audio	Surprise	1
12	25	SP	Control	Videos with audio	Disgust	1
12	25	SP	Control	Videos with audio	Joy	1
12	25	SP	Control	Videos with audio	Fear	1
12	25	SP	Control	Videos with audio	Sadness	1
12	25	SP	Control	Videos with audio	Anger	1
12	25	SP	Control	Videos with audio	Surprise	1
12	25	SP	Control	Videos with audio	Disgust	1
12	25	SP	Control	Videos with audio	Fear	1
12	25	SP	Control	Videos with audio	Joy	1
12	25	SP	Control	Videos with audio	Anger	1
18	60	SP	Supported	Pictures	Surprise	1	1
18	60	SP	Supported	Pictures	Joy	1	1
18	60	SP	Supported	Pictures	Disgust	1	1
18	60	SP	Supported	Pictures	Disgust	0	0
18	60	SP	Supported	Pictures	Fear	1	1
18	60	SP	Supported	Pictures	Surprise	1	0
18	60	SP	Supported	Pictures	Fear	1	1
18	60	SP	Supported	Pictures	Anger	1	1
18	60	SP	Supported	Pictures	Sadness	1	1
18	60	SP	Supported	Pictures	Sadness	1	1
18	60	SP	Supported	Pictures	Anger	1	1
18	60	SP	Supported	Pictures	Joy	1	1
18	60	SP	Supported	Silent videos	Joy	1	1
18	60	SP	Supported	Silent videos	Sadness	1	1
18	60	SP	Supported	Silent videos	Joy	1	1
18	60	SP	Supported	Silent videos	Fear	1	0
18	60	SP	Supported	Silent videos	Disgust	1	1
18	60	SP	Supported	Silent videos	Disgust	1	1
18	60	SP	Supported	Silent videos	Surprise	1	1
18	60	SP	Supported	Silent videos	Fear	1	1
18	60	SP	Supported	Silent videos	Anger	1	1
18	60	SP	Supported	Silent videos	Anger	1	0
18	60	SP	Supported	Silent videos	Sadness	1	1
18	60	SP	Supported	Silent videos	Surprise	1	1
18	60	SP	Supported	Videos with audio	Joy	1	1
18	60	SP	Supported	Videos with audio	Joy	1	1
18	60	SP	Supported	Videos with audio	Anger	1	1
18	60	SP	Supported	Videos with audio	Surprise	1	1
18	60	SP	Supported	Videos with audio	Surprise	1	1
18	60	SP	Supported	Videos with audio	Fear	1	1
18	60	SP	Supported	Videos with audio	Anger	1	1
18	60	SP	Supported	Videos with audio	Disgust	1	1
18	60	SP	Supported	Videos with audio	Sadness	1	1
18	60	SP	Supported	Videos with audio	Sadness	1	0
18	60	SP	Supported	Videos with audio	Fear	1	0
18	60	SP	Supported	Videos with audio	Disgust	1	1
18	60	SP	Control	Pictures	Joy	1
18	60	SP	Control	Pictures	Fear	0
18	60	SP	Control	Pictures	Sadness	1
18	60	SP	Control	Pictures	Fear	1
18	60	SP	Control	Pictures	Disgust	1
18	60	SP	Control	Pictures	Anger	0
18	60	SP	Control	Pictures	Surprise	1
18	60	SP	Control	Pictures	Joy	1
18	60	SP	Control	Pictures	Disgust	1
18	60	SP	Control	Pictures	Sadness	0
18	60	SP	Control	Pictures	Surprise	1
18	60	SP	Control	Pictures	Anger	1
18	60	SP	Control	Silent videos	Surprise	1
18	60	SP	Control	Silent videos	Disgust	1
18	60	SP	Control	Silent videos	Sadness	1
18	60	SP	Control	Silent videos	Disgust	1
18	60	SP	Control	Silent videos	Anger	0
18	60	SP	Control	Silent videos	Sadness	1
18	60	SP	Control	Silent videos	Joy	1
18	60	SP	Control	Silent videos	Joy	1
18	60	SP	Control	Silent videos	Fear	1
18	60	SP	Control	Silent videos	Fear	0
18	60	SP	Control	Silent videos	Surprise	1
18	60	SP	Control	Silent videos	Anger	1
18	60	SP	Control	Videos with audio	Sadness	1
18	60	SP	Control	Videos with audio	Surprise	1
18	60	SP	Control	Videos with audio	Disgust	1
18	60	SP	Control	Videos with audio	Joy	1
18	60	SP	Control	Videos with audio	Fear	1
18	60	SP	Control	Videos with audio	Sadness	1
18	60	SP	Control	Videos with audio	Anger	1
18	60	SP	Control	Videos with audio	Surprise	1
18	60	SP	Control	Videos with audio	Disgust	1
18	60	SP	Control	Videos with audio	Fear	1
18	60	SP	Control	Videos with audio	Joy	1
18	60	SP	Control	Videos with audio	Anger	1
20	20	SP	Supported	Pictures	Surprise	1	1
20	20	SP	Supported	Pictures	Joy	1	1
20	20	SP	Supported	Pictures	Disgust	1	0
20	20	SP	Supported	Pictures	Disgust	1	1
20	20	SP	Supported	Pictures	Fear	1	1
20	20	SP	Supported	Pictures	Surprise	1	1
20	20	SP	Supported	Pictures	Fear	1	1
20	20	SP	Supported	Pictures	Anger	1	1
20	20	SP	Supported	Pictures	Sadness	1	1
20	20	SP	Supported	Pictures	Sadness	1	1
20	20	SP	Supported	Pictures	Anger	1	0
20	20	SP	Supported	Pictures	Joy	1	1
20	20	SP	Supported	Silent videos	Joy	1	1
20	20	SP	Supported	Silent videos	Sadness	1	1
20	20	SP	Supported	Silent videos	Joy	1	1
20	20	SP	Supported	Silent videos	Fear	1	0
20	20	SP	Supported	Silent videos	Disgust	1	0
20	20	SP	Supported	Silent videos	Disgust	1	1
20	20	SP	Supported	Silent videos	Surprise	1	1
20	20	SP	Supported	Silent videos	Fear	1	1
20	20	SP	Supported	Silent videos	Anger	1	0
20	20	SP	Supported	Silent videos	Anger	1	0
20	20	SP	Supported	Silent videos	Sadness	1	1
20	20	SP	Supported	Silent videos	Surprise	1	1
20	20	SP	Supported	Videos with audio	Joy	1	1
20	20	SP	Supported	Videos with audio	Joy	1	1
20	20	SP	Supported	Videos with audio	Anger	1	0
20	20	SP	Supported	Videos with audio	Surprise	1	1
20	20	SP	Supported	Videos with audio	Surprise	1	1
20	20	SP	Supported	Videos with audio	Fear	0	0
20	20	SP	Supported	Videos with audio	Anger	1	0
20	20	SP	Supported	Videos with audio	Disgust	1	0
20	20	SP	Supported	Videos with audio	Sadness	1	1
20	20	SP	Supported	Videos with audio	Sadness	1	0
20	20	SP	Supported	Videos with audio	Fear	1	0
20	20	SP	Supported	Videos with audio	Disgust	1	1
20	20	SP	Control	Pictures	Joy	1
20	20	SP	Control	Pictures	Fear	1
20	20	SP	Control	Pictures	Sadness	1
20	20	SP	Control	Pictures	Fear	1
20	20	SP	Control	Pictures	Disgust	0
20	20	SP	Control	Pictures	Anger	1
20	20	SP	Control	Pictures	Surprise	1
20	20	SP	Control	Pictures	Joy	1
20	20	SP	Control	Pictures	Disgust	1
20	20	SP	Control	Pictures	Sadness	1
20	20	SP	Control	Pictures	Surprise	1
20	20	SP	Control	Pictures	Anger	1
20	20	SP	Control	Silent videos	Surprise	1
20	20	SP	Control	Silent videos	Disgust	0
20	20	SP	Control	Silent videos	Sadness	1
20	20	SP	Control	Silent videos	Disgust	0
20	20	SP	Control	Silent videos	Anger	1
20	20	SP	Control	Silent videos	Sadness	1
20	20	SP	Control	Silent videos	Joy	1
20	20	SP	Control	Silent videos	Joy	1
20	20	SP	Control	Silent videos	Fear	1
20	20	SP	Control	Silent videos	Fear	1
20	20	SP	Control	Silent videos	Surprise	1
20	20	SP	Control	Silent videos	Anger	1
20	20	SP	Control	Videos with audio	Sadness	1
20	20	SP	Control	Videos with audio	Surprise	1
20	20	SP	Control	Videos with audio	Disgust	1
20	20	SP	Control	Videos with audio	Joy	1
20	20	SP	Control	Videos with audio	Fear	1
20	20	SP	Control	Videos with audio	Sadness	1
20	20	SP	Control	Videos with audio	Anger	1
20	20	SP	Control	Videos with audio	Surprise	1
20	20	SP	Control	Videos with audio	Disgust	1
20	20	SP	Control	Videos with audio	Fear	1
20	20	SP	Control	Videos with audio	Joy	1
20	20	SP	Control	Videos with audio	Anger	1
19	27	VIP	Supported	Pictures	Surprise	1	0
19	27	VIP	Supported	Pictures	Joy	1	1
19	27	VIP	Supported	Pictures	Disgust	1	1
19	27	VIP	Supported	Pictures	Disgust	1	1
19	27	VIP	Supported	Pictures	Fear	1	1
19	27	VIP	Supported	Pictures	Surprise	1	1
19	27	VIP	Supported	Pictures	Fear	1	1
19	27	VIP	Supported	Pictures	Anger	1	1
19	27	VIP	Supported	Pictures	Sadness	1	1
19	27	VIP	Supported	Pictures	Sadness	1	1
19	27	VIP	Supported	Pictures	Anger	1	1
19	27	VIP	Supported	Pictures	Joy	1	1
19	27	VIP	Supported	Silent videos	Joy	1	1
19	27	VIP	Supported	Silent videos	Sadness	1	1
19	27	VIP	Supported	Silent videos	Joy	1	1
19	27	VIP	Supported	Silent videos	Fear	1	1
19	27	VIP	Supported	Silent videos	Disgust	1	0
19	27	VIP	Supported	Silent videos	Disgust	1	1
19	27	VIP	Supported	Silent videos	Surprise	1	1
19	27	VIP	Supported	Silent videos	Fear	1	1
19	27	VIP	Supported	Silent videos	Anger	0	0
19	27	VIP	Supported	Silent videos	Anger	0	0
19	27	VIP	Supported	Silent videos	Sadness	1	1
19	27	VIP	Supported	Silent videos	Surprise	1	0
19	27	VIP	Supported	Videos with audio	Joy	1	1
19	27	VIP	Supported	Videos with audio	Joy	1	1
19	27	VIP	Supported	Videos with audio	Anger	1	0
19	27	VIP	Supported	Videos with audio	Surprise	1	1
19	27	VIP	Supported	Videos with audio	Surprise	1	1
19	27	VIP	Supported	Videos with audio	Fear	1	1
19	27	VIP	Supported	Videos with audio	Anger	1	0
19	27	VIP	Supported	Videos with audio	Disgust	1	0
19	27	VIP	Supported	Videos with audio	Sadness	1	1
19	27	VIP	Supported	Videos with audio	Sadness	1	0
19	27	VIP	Supported	Videos with audio	Fear	0	0
19	27	VIP	Supported	Videos with audio	Disgust	1	1
19	27	VIP	Control	Pictures	Joy	0
19	27	VIP	Control	Pictures	Fear	0
19	27	VIP	Control	Pictures	Sadness	0
19	27	VIP	Control	Pictures	Fear	0
19	27	VIP	Control	Pictures	Disgust	0
19	27	VIP	Control	Pictures	Anger	0
19	27	VIP	Control	Pictures	Surprise	0
19	27	VIP	Control	Pictures	Joy	0
19	27	VIP	Control	Pictures	Disgust	0
19	27	VIP	Control	Pictures	Sadness	0
19	27	VIP	Control	Pictures	Surprise	0
19	27	VIP	Control	Pictures	Anger	0
19	27	VIP	Control	Silent videos	Surprise	0
19	27	VIP	Control	Silent videos	Disgust	0
19	27	VIP	Control	Silent videos	Sadness	0
19	27	VIP	Control	Silent videos	Disgust	0
19	27	VIP	Control	Silent videos	Anger	0
19	27	VIP	Control	Silent videos	Sadness	0
19	27	VIP	Control	Silent videos	Joy	0
19	27	VIP	Control	Silent videos	Joy	0
19	27	VIP	Control	Silent videos	Fear	0
19	27	VIP	Control	Silent videos	Fear	0
19	27	VIP	Control	Silent videos	Surprise	0
19	27	VIP	Control	Silent videos	Anger	0
19	27	VIP	Control	Videos with audio	Sadness	1
19	27	VIP	Control	Videos with audio	Surprise	0
19	27	VIP	Control	Videos with audio	Disgust	1
19	27	VIP	Control	Videos with audio	Joy	1
19	27	VIP	Control	Videos with audio	Fear	0
19	27	VIP	Control	Videos with audio	Sadness	1
19	27	VIP	Control	Videos with audio	Anger	0
19	27	VIP	Control	Videos with audio	Surprise	0
19	27	VIP	Control	Videos with audio	Disgust	0
19	27	VIP	Control	Videos with audio	Fear	0
19	27	VIP	Control	Videos with audio	Joy	1
19	27	VIP	Control	Videos with audio	Anger	0
23	54	SP	Supported	Pictures	Surprise	1	1
23	54	SP	Supported	Pictures	Joy	1	1
23	54	SP	Supported	Pictures	Disgust	1	1
23	54	SP	Supported	Pictures	Disgust	1	1
23	54	SP	Supported	Pictures	Fear	1	1
23	54	SP	Supported	Pictures	Surprise	1	1
23	54	SP	Supported	Pictures	Fear	0	0
23	54	SP	Supported	Pictures	Anger	1	0
23	54	SP	Supported	Pictures	Sadness	1	1
23	54	SP	Supported	Pictures	Sadness	1	1
23	54	SP	Supported	Pictures	Anger	1	1
23	54	SP	Supported	Pictures	Joy	1	1
23	54	SP	Supported	Silent videos	Joy	1	1
23	54	SP	Supported	Silent videos	Sadness	1	1
23	54	SP	Supported	Silent videos	Joy	1	1
23	54	SP	Supported	Silent videos	Fear	1	0
23	54	SP	Supported	Silent videos	Disgust	1	0
23	54	SP	Supported	Silent videos	Disgust	1	0
23	54	SP	Supported	Silent videos	Surprise	1	1
23	54	SP	Supported	Silent videos	Fear	0	1
23	54	SP	Supported	Silent videos	Anger	1	0
23	54	SP	Supported	Silent videos	Anger	1	0
23	54	SP	Supported	Silent videos	Sadness	1	0
23	54	SP	Supported	Silent videos	Surprise	1	1
23	54	SP	Supported	Videos with audio	Joy	1	1
23	54	SP	Supported	Videos with audio	Joy	1	1
23	54	SP	Supported	Videos with audio	Anger	1	0
23	54	SP	Supported	Videos with audio	Surprise	1	0
23	54	SP	Supported	Videos with audio	Surprise	1	1
23	54	SP	Supported	Videos with audio	Fear	1	1
23	54	SP	Supported	Videos with audio	Anger	1	0
23	54	SP	Supported	Videos with audio	Disgust	1	0
23	54	SP	Supported	Videos with audio	Sadness	1	1
23	54	SP	Supported	Videos with audio	Sadness	1	0
23	54	SP	Supported	Videos with audio	Fear	0	0
23	54	SP	Supported	Videos with audio	Disgust	1	1
23	54	SP	Control	Pictures	Joy	1
23	54	SP	Control	Pictures	Fear	1
23	54	SP	Control	Pictures	Sadness	0
23	54	SP	Control	Pictures	Fear	1
23	54	SP	Control	Pictures	Disgust	1
23	54	SP	Control	Pictures	Anger	1
23	54	SP	Control	Pictures	Surprise	1
23	54	SP	Control	Pictures	Joy	1
23	54	SP	Control	Pictures	Disgust	1
23	54	SP	Control	Pictures	Sadness	1
23	54	SP	Control	Pictures	Surprise	1
23	54	SP	Control	Pictures	Anger	1
23	54	SP	Control	Silent videos	Surprise	1
23	54	SP	Control	Silent videos	Disgust	1
23	54	SP	Control	Silent videos	Sadness	1
23	54	SP	Control	Silent videos	Disgust	1
23	54	SP	Control	Silent videos	Anger	1
23	54	SP	Control	Silent videos	Sadness	1
23	54	SP	Control	Silent videos	Joy	1
23	54	SP	Control	Silent videos	Joy	1
23	54	SP	Control	Silent videos	Fear	1
23	54	SP	Control	Silent videos	Fear	0
23	54	SP	Control	Silent videos	Surprise	1
23	54	SP	Control	Silent videos	Anger	1
23	54	SP	Control	Videos with audio	Sadness	1
23	54	SP	Control	Videos with audio	Surprise	1
23	54	SP	Control	Videos with audio	Disgust	1
23	54	SP	Control	Videos with audio	Joy	1
23	54	SP	Control	Videos with audio	Fear	0
23	54	SP	Control	Videos with audio	Sadness	1
23	54	SP	Control	Videos with audio	Anger	1
23	54	SP	Control	Videos with audio	Surprise	1
23	54	SP	Control	Videos with audio	Disgust	1
23	54	SP	Control	Videos with audio	Fear	1
23	54	SP	Control	Videos with audio	Joy	1
23	54	SP	Control	Videos with audio	Anger	1
8	58	VIP	Supported	Pictures	Surprise	0	0
8	58	VIP	Supported	Pictures	Joy	1	1
8	58	VIP	Supported	Pictures	Disgust	1	0
8	58	VIP	Supported	Pictures	Disgust	1	1
8	58	VIP	Supported	Pictures	Fear	1	1
8	58	VIP	Supported	Pictures	Surprise	1	1
8	58	VIP	Supported	Pictures	Fear	1	1
8	58	VIP	Supported	Pictures	Anger	1	1
8	58	VIP	Supported	Pictures	Sadness	1	1
8	58	VIP	Supported	Pictures	Sadness	1	1
8	58	VIP	Supported	Pictures	Anger	1	1
8	58	VIP	Supported	Pictures	Joy	1	1
8	58	VIP	Supported	Silent videos	Joy	1	1
8	58	VIP	Supported	Silent videos	Sadness	1	1
8	58	VIP	Supported	Silent videos	Joy	1	1
8	58	VIP	Supported	Silent videos	Fear	1	1
8	58	VIP	Supported	Silent videos	Disgust	0	1
8	58	VIP	Supported	Silent videos	Disgust	0	0
8	58	VIP	Supported	Silent videos	Surprise	1	1
8	58	VIP	Supported	Silent videos	Fear	1	1
8	58	VIP	Supported	Silent videos	Anger	0	0
8	58	VIP	Supported	Silent videos	Anger	0	0
8	58	VIP	Supported	Silent videos	Sadness	1	1
8	58	VIP	Supported	Silent videos	Surprise	1	1
8	58	VIP	Supported	Videos with audio	Joy	1	1
8	58	VIP	Supported	Videos with audio	Joy	1	1
8	58	VIP	Supported	Videos with audio	Anger	1	1
8	58	VIP	Supported	Videos with audio	Surprise	1	1
8	58	VIP	Supported	Videos with audio	Surprise	1	1
8	58	VIP	Supported	Videos with audio	Fear	1	1
8	58	VIP	Supported	Videos with audio	Anger	0	0
8	58	VIP	Supported	Videos with audio	Disgust	1	0
8	58	VIP	Supported	Videos with audio	Sadness	1	1
8	58	VIP	Supported	Videos with audio	Sadness	1	1
8	58	VIP	Supported	Videos with audio	Fear	0	0
8	58	VIP	Supported	Videos with audio	Disgust	1	1
8	58	VIP	Control	Pictures	Joy	0
8	58	VIP	Control	Pictures	Fear	0
8	58	VIP	Control	Pictures	Sadness	0
8	58	VIP	Control	Pictures	Fear	0
8	58	VIP	Control	Pictures	Disgust	0
8	58	VIP	Control	Pictures	Anger	0
8	58	VIP	Control	Pictures	Surprise	0
8	58	VIP	Control	Pictures	Joy	0
8	58	VIP	Control	Pictures	Disgust	0
8	58	VIP	Control	Pictures	Sadness	0
8	58	VIP	Control	Pictures	Surprise	0
8	58	VIP	Control	Pictures	Anger	0
8	58	VIP	Control	Silent videos	Surprise	0
8	58	VIP	Control	Silent videos	Disgust	0
8	58	VIP	Control	Silent videos	Sadness	0
8	58	VIP	Control	Silent videos	Disgust	0
8	58	VIP	Control	Silent videos	Anger	0
8	58	VIP	Control	Silent videos	Sadness	0
8	58	VIP	Control	Silent videos	Joy	0
8	58	VIP	Control	Silent videos	Joy	0
8	58	VIP	Control	Silent videos	Fear	0
8	58	VIP	Control	Silent videos	Fear	0
8	58	VIP	Control	Silent videos	Surprise	0
8	58	VIP	Control	Silent videos	Anger	0
8	58	VIP	Control	Videos with audio	Sadness	1
8	58	VIP	Control	Videos with audio	Surprise	1
8	58	VIP	Control	Videos with audio	Disgust	1
8	58	VIP	Control	Videos with audio	Joy	1
8	58	VIP	Control	Videos with audio	Fear	0
8	58	VIP	Control	Videos with audio	Sadness	1
8	58	VIP	Control	Videos with audio	Anger	1
8	58	VIP	Control	Videos with audio	Surprise	0
8	58	VIP	Control	Videos with audio	Disgust	1
8	58	VIP	Control	Videos with audio	Fear	1
8	58	VIP	Control	Videos with audio	Joy	1
8	58	VIP	Control	Videos with audio	Anger	1
14	54	SP	Supported	Pictures	Surprise	1	1
14	54	SP	Supported	Pictures	Joy	1	1
14	54	SP	Supported	Pictures	Disgust	1	1
14	54	SP	Supported	Pictures	Disgust	1	1
14	54	SP	Supported	Pictures	Fear	0	1
14	54	SP	Supported	Pictures	Surprise	1	1
14	54	SP	Supported	Pictures	Fear	0	1
14	54	SP	Supported	Pictures	Anger	1	1
14	54	SP	Supported	Pictures	Sadness	1	1
14	54	SP	Supported	Pictures	Sadness	1	1
14	54	SP	Supported	Pictures	Anger	1	1
14	54	SP	Supported	Pictures	Joy	1	1
14	54	SP	Supported	Silent videos	Joy	1	1
14	54	SP	Supported	Silent videos	Sadness	1	1
14	54	SP	Supported	Silent videos	Joy	1	1
14	54	SP	Supported	Silent videos	Fear	1	0
14	54	SP	Supported	Silent videos	Disgust	1	1
14	54	SP	Supported	Silent videos	Disgust	1	1
14	54	SP	Supported	Silent videos	Surprise	1	1
14	54	SP	Supported	Silent videos	Fear	1	1
14	54	SP	Supported	Silent videos	Anger	1	0
14	54	SP	Supported	Silent videos	Anger	1	1
14	54	SP	Supported	Silent videos	Sadness	1	0
14	54	SP	Supported	Silent videos	Surprise	1	1
14	54	SP	Supported	Videos with audio	Joy	1	1
14	54	SP	Supported	Videos with audio	Joy	1	1
14	54	SP	Supported	Videos with audio	Anger	1	1
14	54	SP	Supported	Videos with audio	Surprise	1	1
14	54	SP	Supported	Videos with audio	Surprise	1	1
14	54	SP	Supported	Videos with audio	Fear	1	1
14	54	SP	Supported	Videos with audio	Anger	1	0
14	54	SP	Supported	Videos with audio	Disgust	1	0
14	54	SP	Supported	Videos with audio	Sadness	1	1
14	54	SP	Supported	Videos with audio	Sadness	1	1
14	54	SP	Supported	Videos with audio	Fear	1	0
14	54	SP	Supported	Videos with audio	Disgust	1	0
14	54	SP	Control	Pictures	Joy	1
14	54	SP	Control	Pictures	Fear	0
14	54	SP	Control	Pictures	Sadness	1
14	54	SP	Control	Pictures	Fear	1
14	54	SP	Control	Pictures	Disgust	1
14	54	SP	Control	Pictures	Anger	1
14	54	SP	Control	Pictures	Surprise	1
14	54	SP	Control	Pictures	Joy	1
14	54	SP	Control	Pictures	Disgust	1
14	54	SP	Control	Pictures	Sadness	1
14	54	SP	Control	Pictures	Surprise	1
14	54	SP	Control	Pictures	Anger	1
14	54	SP	Control	Silent videos	Surprise	1
14	54	SP	Control	Silent videos	Disgust	1
14	54	SP	Control	Silent videos	Sadness	1
14	54	SP	Control	Silent videos	Disgust	1
14	54	SP	Control	Silent videos	Anger	1
14	54	SP	Control	Silent videos	Sadness	1
14	54	SP	Control	Silent videos	Joy	1
14	54	SP	Control	Silent videos	Joy	1
14	54	SP	Control	Silent videos	Fear	1
14	54	SP	Control	Silent videos	Fear	0
14	54	SP	Control	Silent videos	Surprise	1
14	54	SP	Control	Silent videos	Anger	1
14	54	SP	Control	Videos with audio	Sadness	1
14	54	SP	Control	Videos with audio	Surprise	1
14	54	SP	Control	Videos with audio	Disgust	1
14	54	SP	Control	Videos with audio	Joy	1
14	54	SP	Control	Videos with audio	Fear	1
14	54	SP	Control	Videos with audio	Sadness	1
14	54	SP	Control	Videos with audio	Anger	1
14	54	SP	Control	Videos with audio	Surprise	1
14	54	SP	Control	Videos with audio	Disgust	1
14	54	SP	Control	Videos with audio	Fear	1
14	54	SP	Control	Videos with audio	Joy	1
14	54	SP	Control	Videos with audio	Anger	1
21	43	VIP	Supported	Pictures	Surprise	1	1
21	43	VIP	Supported	Pictures	Joy	1	1
21	43	VIP	Supported	Pictures	Disgust	1	1
21	43	VIP	Supported	Pictures	Disgust	1	1
21	43	VIP	Supported	Pictures	Fear	1	1
21	43	VIP	Supported	Pictures	Surprise	1	1
21	43	VIP	Supported	Pictures	Fear	1	1
21	43	VIP	Supported	Pictures	Anger	1	1
21	43	VIP	Supported	Pictures	Sadness	1	1
21	43	VIP	Supported	Pictures	Sadness	1	1
21	43	VIP	Supported	Pictures	Anger	0	0
21	43	VIP	Supported	Pictures	Joy	1	1
21	43	VIP	Supported	Silent videos	Joy	1	1
21	43	VIP	Supported	Silent videos	Sadness	1	1
21	43	VIP	Supported	Silent videos	Joy	0	1
21	43	VIP	Supported	Silent videos	Fear	1	1
21	43	VIP	Supported	Silent videos	Disgust	0	0
21	43	VIP	Supported	Silent videos	Disgust	1	1
21	43	VIP	Supported	Silent videos	Surprise	1	1
21	43	VIP	Supported	Silent videos	Fear	1	1
21	43	VIP	Supported	Silent videos	Anger	0	0
21	43	VIP	Supported	Silent videos	Anger	0	0
21	43	VIP	Supported	Silent videos	Sadness	1	1
21	43	VIP	Supported	Silent videos	Surprise	1	1
21	43	VIP	Supported	Videos with audio	Joy	1	1
21	43	VIP	Supported	Videos with audio	Joy	1	1
21	43	VIP	Supported	Videos with audio	Anger	0	0
21	43	VIP	Supported	Videos with audio	Surprise	1	1
21	43	VIP	Supported	Videos with audio	Surprise	1	1
21	43	VIP	Supported	Videos with audio	Fear	1	1
21	43	VIP	Supported	Videos with audio	Anger	0	0
21	43	VIP	Supported	Videos with audio	Disgust	1	0
21	43	VIP	Supported	Videos with audio	Sadness	1	1
21	43	VIP	Supported	Videos with audio	Sadness	1	1
21	43	VIP	Supported	Videos with audio	Fear	0	0
21	43	VIP	Supported	Videos with audio	Disgust	1	1
21	43	VIP	Control	Pictures	Joy	1
21	43	VIP	Control	Pictures	Fear	0
21	43	VIP	Control	Pictures	Sadness	0
21	43	VIP	Control	Pictures	Fear	0
21	43	VIP	Control	Pictures	Disgust	0
21	43	VIP	Control	Pictures	Anger	0
21	43	VIP	Control	Pictures	Surprise	0
21	43	VIP	Control	Pictures	Joy	0
21	43	VIP	Control	Pictures	Disgust	0
21	43	VIP	Control	Pictures	Sadness	0
21	43	VIP	Control	Pictures	Surprise	0
21	43	VIP	Control	Pictures	Anger	0
21	43	VIP	Control	Silent videos	Surprise	0
21	43	VIP	Control	Silent videos	Disgust	0
21	43	VIP	Control	Silent videos	Sadness	0
21	43	VIP	Control	Silent videos	Disgust	0
21	43	VIP	Control	Silent videos	Anger	0
21	43	VIP	Control	Silent videos	Sadness	0
21	43	VIP	Control	Silent videos	Joy	0
21	43	VIP	Control	Silent videos	Joy	0
21	43	VIP	Control	Silent videos	Fear	0
21	43	VIP	Control	Silent videos	Fear	0
21	43	VIP	Control	Silent videos	Surprise	0
21	43	VIP	Control	Silent videos	Anger	0
21	43	VIP	Control	Videos with audio	Sadness	1
21	43	VIP	Control	Videos with audio	Surprise	0
21	43	VIP	Control	Videos with audio	Disgust	1
21	43	VIP	Control	Videos with audio	Joy	1
21	43	VIP	Control	Videos with audio	Fear	0
21	43	VIP	Control	Videos with audio	Sadness	1
21	43	VIP	Control	Videos with audio	Anger	1
21	43	VIP	Control	Videos with audio	Surprise	1
21	43	VIP	Control	Videos with audio	Disgust	1
21	43	VIP	Control	Videos with audio	Fear	0
21	43	VIP	Control	Videos with audio	Joy	1
21	43	VIP	Control	Videos with audio	Anger	1
15	50	VIP	Supported	Pictures	Surprise	1	1
15	50	VIP	Supported	Pictures	Joy	1	1
15	50	VIP	Supported	Pictures	Disgust	1	1
15	50	VIP	Supported	Pictures	Disgust	1	1
15	50	VIP	Supported	Pictures	Fear	1	1
15	50	VIP	Supported	Pictures	Surprise	0	0
15	50	VIP	Supported	Pictures	Fear	1	1
15	50	VIP	Supported	Pictures	Anger	0	1
15	50	VIP	Supported	Pictures	Sadness	1	1
15	50	VIP	Supported	Pictures	Sadness	1	1
15	50	VIP	Supported	Pictures	Anger	1	1
15	50	VIP	Supported	Pictures	Joy	1	1
15	50	VIP	Supported	Silent videos	Joy	1	1
15	50	VIP	Supported	Silent videos	Sadness	1	1
15	50	VIP	Supported	Silent videos	Joy	1	1
15	50	VIP	Supported	Silent videos	Fear	0	0
15	50	VIP	Supported	Silent videos	Disgust	1	1
15	50	VIP	Supported	Silent videos	Disgust	1	1
15	50	VIP	Supported	Silent videos	Surprise	1	1
15	50	VIP	Supported	Silent videos	Fear	1	1
15	50	VIP	Supported	Silent videos	Anger	0	0
15	50	VIP	Supported	Silent videos	Anger	0	0
15	50	VIP	Supported	Silent videos	Sadness	1	1
15	50	VIP	Supported	Silent videos	Surprise	1	1
15	50	VIP	Supported	Videos with audio	Joy	1	1
15	50	VIP	Supported	Videos with audio	Joy	1	1
15	50	VIP	Supported	Videos with audio	Anger	0	0
15	50	VIP	Supported	Videos with audio	Surprise	1	1
15	50	VIP	Supported	Videos with audio	Surprise	1	1
15	50	VIP	Supported	Videos with audio	Fear	1	1
15	50	VIP	Supported	Videos with audio	Anger	0	0
15	50	VIP	Supported	Videos with audio	Disgust	1	1
15	50	VIP	Supported	Videos with audio	Sadness	1	1
15	50	VIP	Supported	Videos with audio	Sadness	1	1
15	50	VIP	Supported	Videos with audio	Fear	1	0
15	50	VIP	Supported	Videos with audio	Disgust	1	1
15	50	VIP	Control	Pictures	Joy	0
15	50	VIP	Control	Pictures	Fear	0
15	50	VIP	Control	Pictures	Sadness	0
15	50	VIP	Control	Pictures	Fear	0
15	50	VIP	Control	Pictures	Disgust	0
15	50	VIP	Control	Pictures	Anger	0
15	50	VIP	Control	Pictures	Surprise	0
15	50	VIP	Control	Pictures	Joy	0
15	50	VIP	Control	Pictures	Disgust	0
15	50	VIP	Control	Pictures	Sadness	0
15	50	VIP	Control	Pictures	Surprise	0
15	50	VIP	Control	Pictures	Anger	0
15	50	VIP	Control	Silent videos	Surprise	0
15	50	VIP	Control	Silent videos	Disgust	0
15	50	VIP	Control	Silent videos	Sadness	0
15	50	VIP	Control	Silent videos	Disgust	0
15	50	VIP	Control	Silent videos	Anger	0
15	50	VIP	Control	Silent videos	Sadness	0
15	50	VIP	Control	Silent videos	Joy	0
15	50	VIP	Control	Silent videos	Joy	0
15	50	VIP	Control	Silent videos	Fear	0
15	50	VIP	Control	Silent videos	Fear	0
15	50	VIP	Control	Silent videos	Surprise	0
15	50	VIP	Control	Silent videos	Anger	0
15	50	VIP	Control	Videos with audio	Sadness	1
15	50	VIP	Control	Videos with audio	Surprise	1
15	50	VIP	Control	Videos with audio	Disgust	1
15	50	VIP	Control	Videos with audio	Joy	1
15	50	VIP	Control	Videos with audio	Fear	1
15	50	VIP	Control	Videos with audio	Sadness	1
15	50	VIP	Control	Videos with audio	Anger	1
15	50	VIP	Control	Videos with audio	Surprise	0
15	50	VIP	Control	Videos with audio	Disgust	1
15	50	VIP	Control	Videos with audio	Fear	0
15	50	VIP	Control	Videos with audio	Joy	1
15	50	VIP	Control	Videos with audio	Anger	0
24	40	VIP	Supported	Pictures	Surprise	1	1
24	40	VIP	Supported	Pictures	Joy	1	1
24	40	VIP	Supported	Pictures	Disgust	1	1
24	40	VIP	Supported	Pictures	Disgust	1	1
24	40	VIP	Supported	Pictures	Fear	1	0
24	40	VIP	Supported	Pictures	Surprise	1	1
24	40	VIP	Supported	Pictures	Fear	1	1
24	40	VIP	Supported	Pictures	Anger	1	1
24	40	VIP	Supported	Pictures	Sadness	1	1
24	40	VIP	Supported	Pictures	Sadness	1	1
24	40	VIP	Supported	Pictures	Anger	0	0
24	40	VIP	Supported	Pictures	Joy	1	1
24	40	VIP	Supported	Silent videos	Joy	1	1
24	40	VIP	Supported	Silent videos	Sadness	1	1
24	40	VIP	Supported	Silent videos	Joy	1	1
24	40	VIP	Supported	Silent videos	Fear	0	0
24	40	VIP	Supported	Silent videos	Disgust	0	0
24	40	VIP	Supported	Silent videos	Disgust	1	1
24	40	VIP	Supported	Silent videos	Surprise	1	1
24	40	VIP	Supported	Silent videos	Fear	1	1
24	40	VIP	Supported	Silent videos	Anger	0	0
24	40	VIP	Supported	Silent videos	Anger	0	0
24	40	VIP	Supported	Silent videos	Sadness	1	1
24	40	VIP	Supported	Silent videos	Surprise	1	1
24	40	VIP	Supported	Videos with audio	Joy	1	1
24	40	VIP	Supported	Videos with audio	Joy	1	1
24	40	VIP	Supported	Videos with audio	Anger	0	0
24	40	VIP	Supported	Videos with audio	Surprise	1	1
24	40	VIP	Supported	Videos with audio	Surprise	1	1
24	40	VIP	Supported	Videos with audio	Fear	1	1
24	40	VIP	Supported	Videos with audio	Anger	1	1
24	40	VIP	Supported	Videos with audio	Disgust	1	1
24	40	VIP	Supported	Videos with audio	Sadness	1	1
24	40	VIP	Supported	Videos with audio	Sadness	1	1
24	40	VIP	Supported	Videos with audio	Fear	0	0
24	40	VIP	Supported	Videos with audio	Disgust	0	0
24	40	VIP	Control	Pictures	Joy	0
24	40	VIP	Control	Pictures	Fear	0
24	40	VIP	Control	Pictures	Sadness	0
24	40	VIP	Control	Pictures	Fear	0
24	40	VIP	Control	Pictures	Disgust	0
24	40	VIP	Control	Pictures	Anger	0
24	40	VIP	Control	Pictures	Surprise	0
24	40	VIP	Control	Pictures	Joy	0
24	40	VIP	Control	Pictures	Disgust	0
24	40	VIP	Control	Pictures	Sadness	0
24	40	VIP	Control	Pictures	Surprise	0
24	40	VIP	Control	Pictures	Anger	0
24	40	VIP	Control	Silent videos	Surprise	0
24	40	VIP	Control	Silent videos	Disgust	0
24	40	VIP	Control	Silent videos	Sadness	0
24	40	VIP	Control	Silent videos	Disgust	0
24	40	VIP	Control	Silent videos	Anger	0
24	40	VIP	Control	Silent videos	Sadness	0
24	40	VIP	Control	Silent videos	Joy	0
24	40	VIP	Control	Silent videos	Joy	0
24	40	VIP	Control	Silent videos	Fear	0
24	40	VIP	Control	Silent videos	Fear	0
24	40	VIP	Control	Silent videos	Surprise	0
24	40	VIP	Control	Silent videos	Anger	0
24	40	VIP	Control	Videos with audio	Sadness	1
24	40	VIP	Control	Videos with audio	Surprise	0
24	40	VIP	Control	Videos with audio	Disgust	0
24	40	VIP	Control	Videos with audio	Joy	1
24	40	VIP	Control	Videos with audio	Fear	1
24	40	VIP	Control	Videos with audio	Sadness	0
24	40	VIP	Control	Videos with audio	Anger	1
24	40	VIP	Control	Videos with audio	Surprise	1
24	40	VIP	Control	Videos with audio	Disgust	1
24	40	VIP	Control	Videos with audio	Fear	0
24	40	VIP	Control	Videos with audio	Joy	1
24	40	VIP	Control	Videos with audio	Anger	1
